# Supplementary material for: Silver-functionalized bismuth oxide (AgBi2O3) nanoparticles for the superior electrochemical detection of glucose, NO2− and H2O2
Source: Royal Society of Chemistry journal article supplement (doi:10.1039/d2ra08140g), 2023-01-01
Supplement: d2ra08140g1.pdf [file d2ra08140g1.pdf]

## Supporting Information

### Silver-functionalized Bismuth oxide nanoparticles ( $\text{AgBi}_2\text{O}_3$ ) for superior electrochemical detection of Glucose, $\text{NO}_2^-$ and $\text{H}_2\text{O}_2$

M. Ramesh<sup>a</sup>, C. Sankar<sup>b</sup>, S. Umamatheswari<sup>a\*</sup>, R. Ganapathi Raman<sup>c</sup>, R. Jayavel<sup>d</sup> and Dongjin Choi<sup>e\*</sup> and A.G. Ramu<sup>e</sup>

<sup>a</sup>Department of Chemistry, Government Arts College (Affiliated to Bharathidasan University), Tiruchirappalli, 620 022, Tamil Nadu, India.

<sup>b</sup>Department of Chemistry, SRM TRP Engineering College, Tiruchirappalli, 621 105, Tamil Nadu, India.

<sup>c</sup>Department of Physics, Saveetha Engineering College, Thandalam, Chennai - 602 105

<sup>d</sup>Centre for Nanoscience and Technology, Anna University, Chennai, 600025, Tamil Nadu, India.

<sup>e</sup>Department of Materials Science and Engineering, Hongik University, 2639-Sejong-ro, Jochiwon-eup, Sejong-city, 30016, South Korea.

---

\* Corresponding author, Tel.; +91-8438288510  
E. mail: drsumamatheswari@gmail.com (Dr. S. Umamatheswari)  
\* Corresponding author, Tel.; +82-01094126765  
E. mail: djchoi@honigk.ac.kr (Dr. Dongjin Choi)

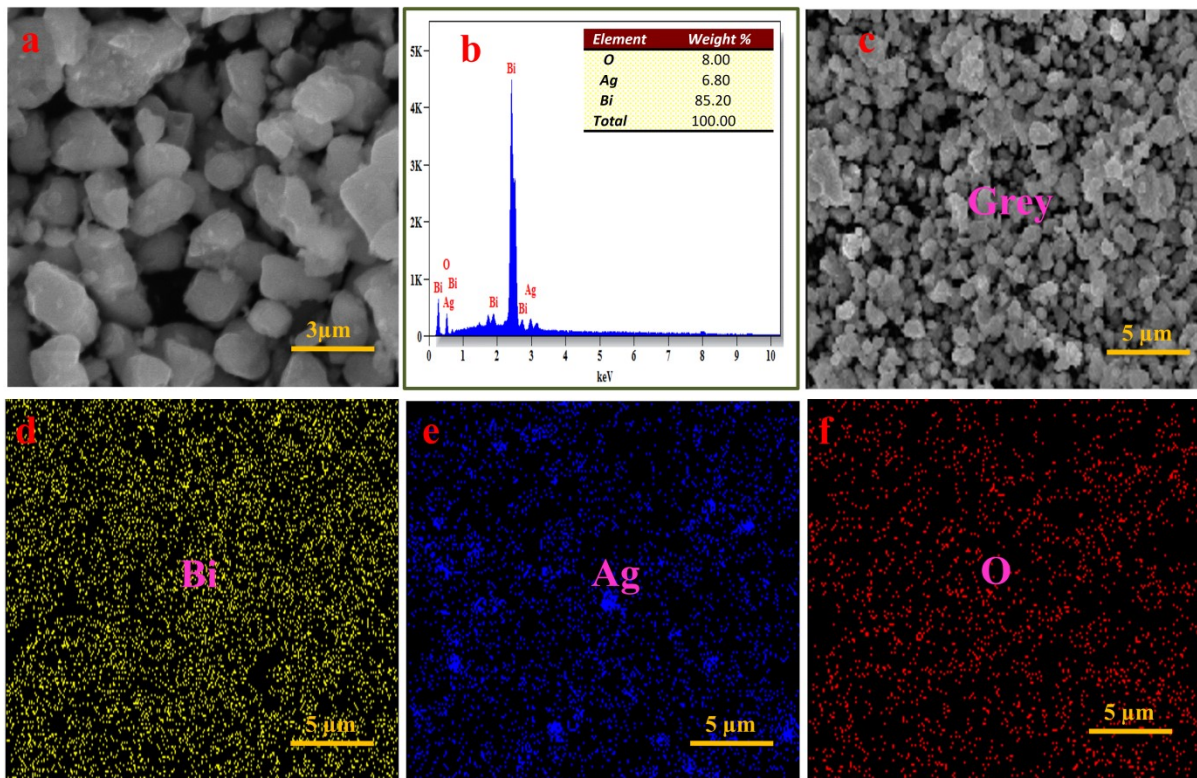

1

2 **Fig. S1.** a) HR-SEM image of SBO NPs, b) EDS spectrum of SBO NPs, c) Mapping analysis  
 3 of gray spectrum, d) Mapping of Bi, e) Mapping of Ag, and f) Mapping of O.

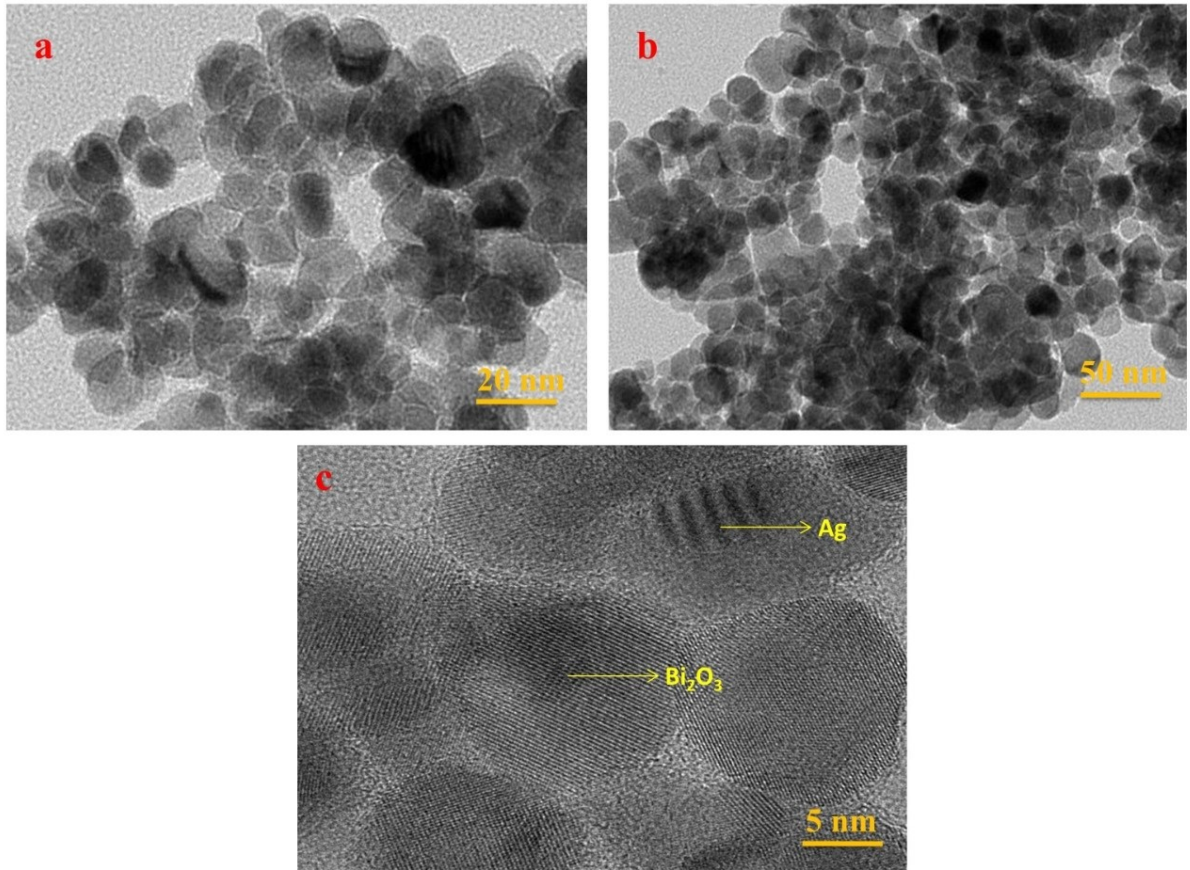

1  
2  
3

**Fig. S2.** HR-TEM image of SBO NPs a) 20nm, b) 50 nm, c) IFFT image.

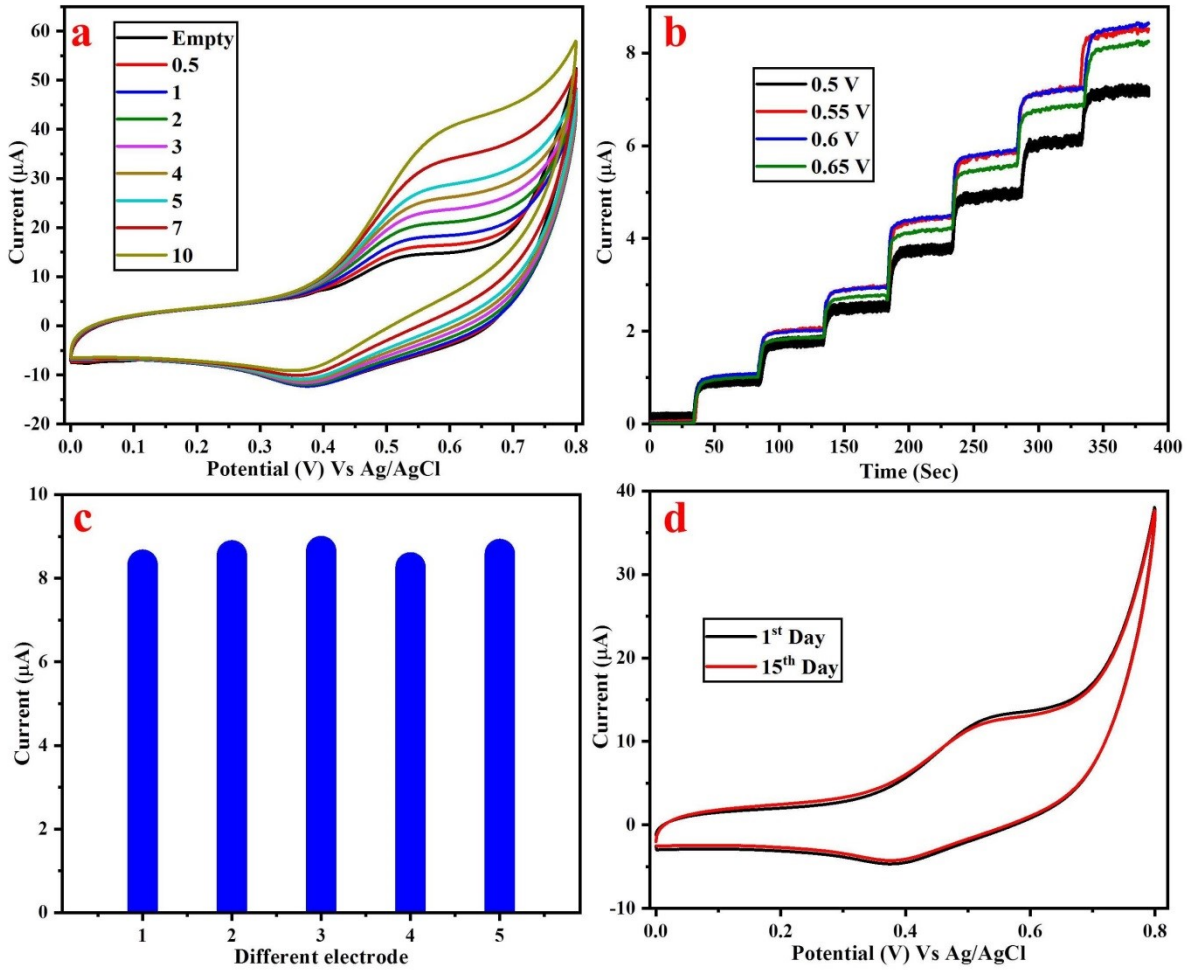

1

2 **Fig. S3.** a) CVs recorded at the SBO-GC electrode with different concentration of glucose. b)  
 3 Amperometric *i-t* curve for different potential in addition of 0.5 and 1 mM of glucose in  
 4 NaOH solution. c) Reproducibility study for SBO-GCE for five different electrodes. d) CV  
 5 plot of stability study recorded before and after 15 days with 1 mM of glucose.

6

7

8

9

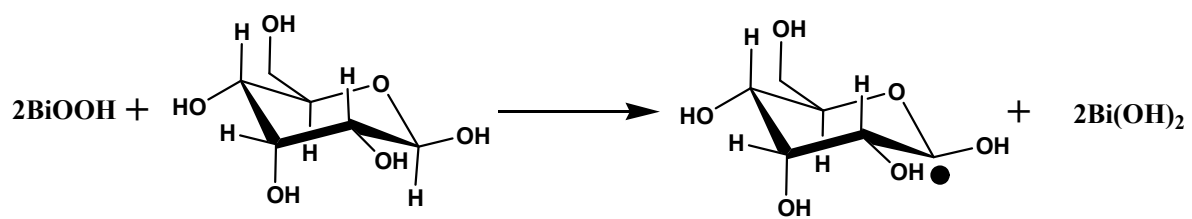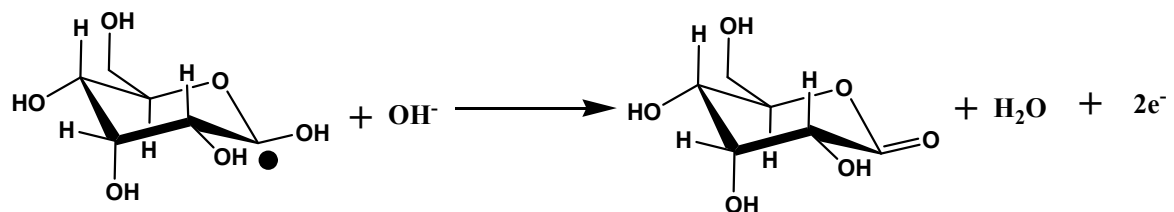

1

2

3

**Scheme S1.** Electrochemical mechanism for detection of glucose

4

5

6

7

8

9

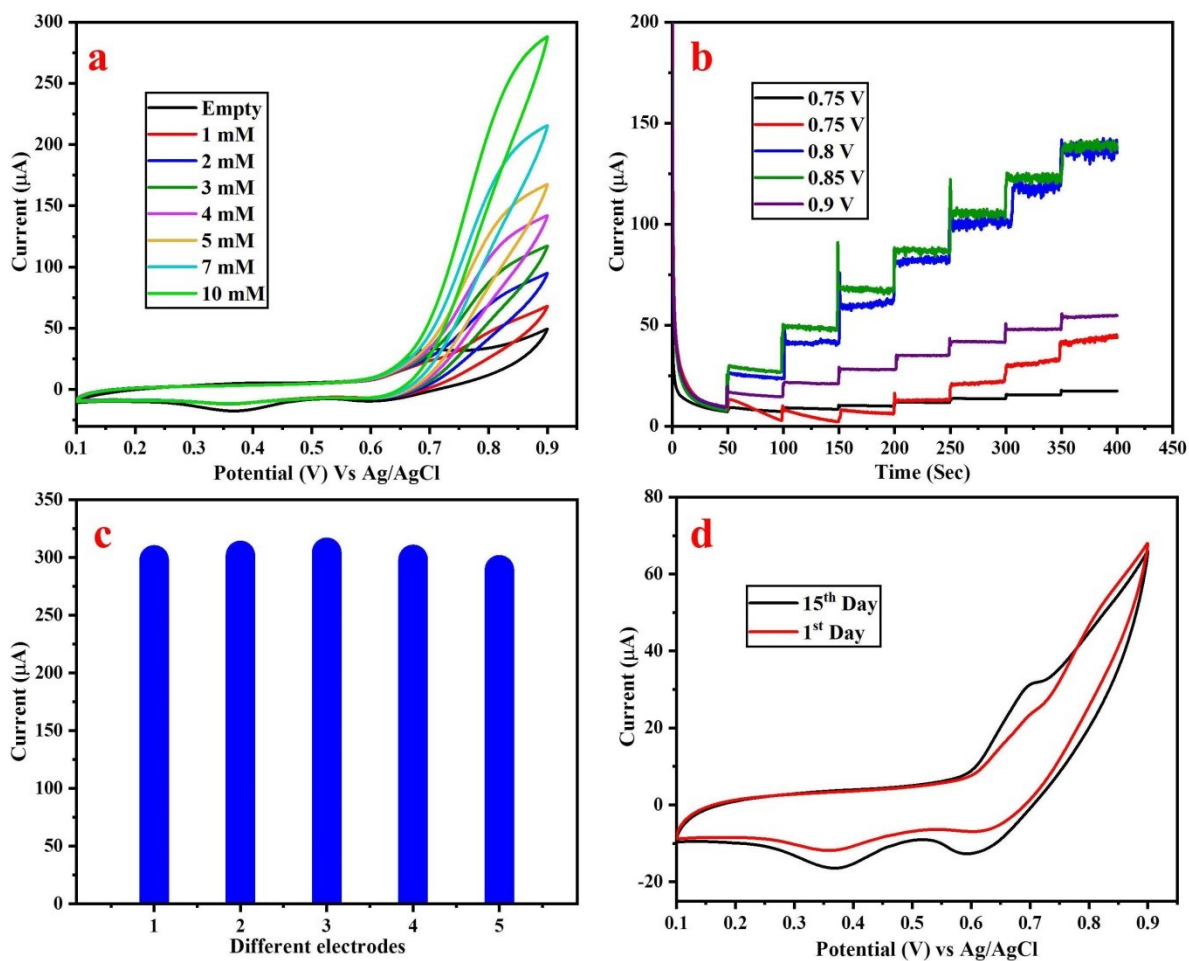

1

2 **Fig. S4.** a) CVs recorded at the SBO-GC electrode with different concentration of  $\text{NO}_2^-$ . b)  
 3 Amperometric  $i-t$  curve for different potential in addition of 0.5 mM of  $\text{NO}_2^-$  in 0.1 M NaOH  
 4 solution. c) Reproducibility study for SBO-GCE for five different electrodes. d) CV plot of  
 5 stability study recorded before and after 15 days with 1 mM of  $\text{NO}_2^-$ .

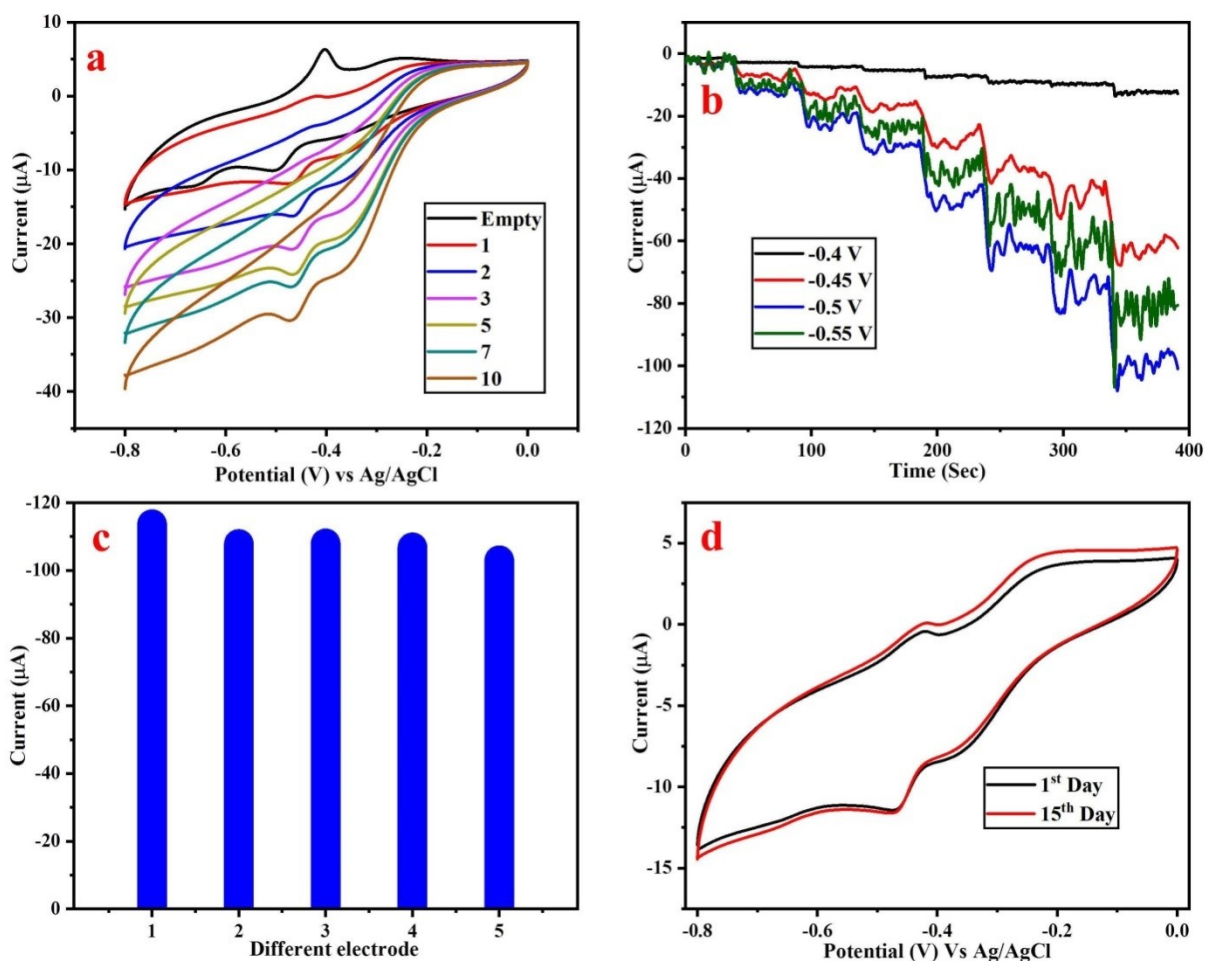

1

2 **Fig. S5.** a) CVs recorded at the SBO-GC electrode with different concentration of glucose. b)  
 3 Amperometric  $i-t$  curve for different potential in addition of 0.5 and 1 mM of  $\text{H}_2\text{O}_2$  in 0.1 M  
 4 NaOH solution. c) Reproducibility study for SBO-GCE for five different electrodes. d) CV  
 5 plot of stability study recorded before and after 15 days with 1 mM of  $\text{H}_2\text{O}_2$ .

6

7

8

9

10

11

12

13

14

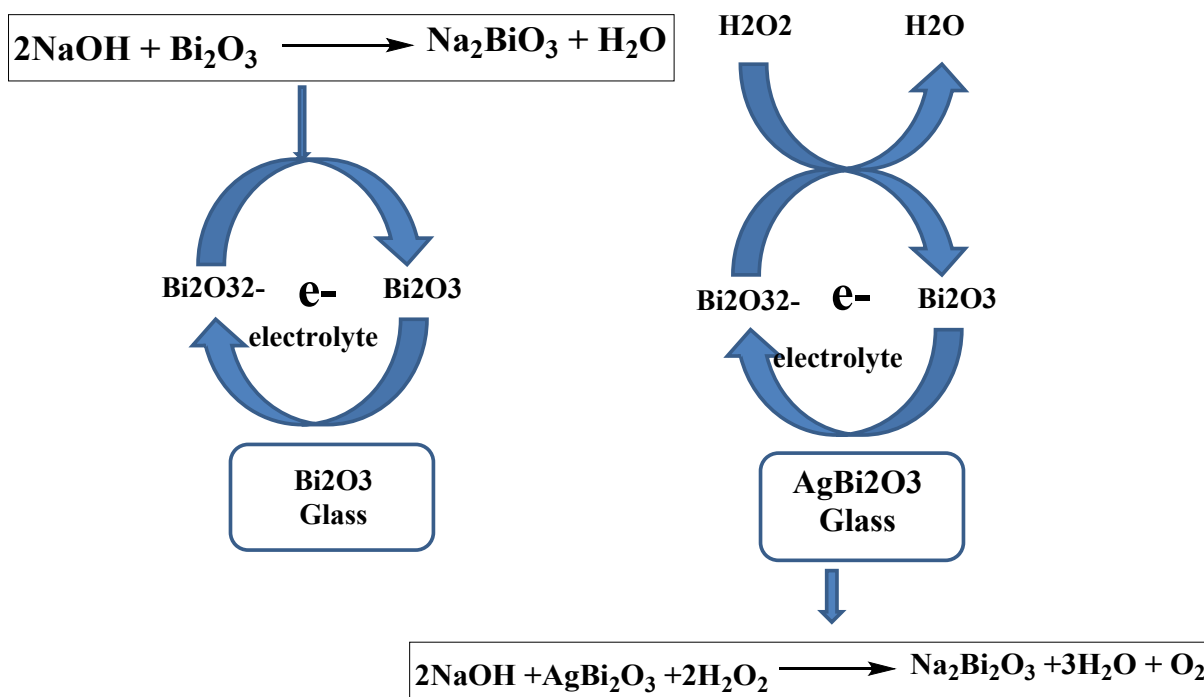

1

2

3 **Fig. S6.** The proposed mechanism for the reduction of  $\text{H}_2\text{O}_2$  on the SBO-GC electrode

4 **Effect of temperature**

5 The amperometric response was recorded in optimum working environments (in 0.1

6 M NaOH), at various temperatures (20 to 40 °C), which are shown in **Fig. S7**. The steady

7 state current increases from 20 to 30 °C, after 30 °C it was decreased in the amperometric

8 response. This drop was an effect of the loss of activity initiated by the higher temperatures.

9 Conversely, the amperometric response of the biosensor at 25 and 30 °C was very similar to

10 each other (**Fig. S7**). Therefore, in order to keep the fabricated electrode more stable, 25 °C,

11 which is very close to the growth temperature of the bacterium (28 °C), was employed in

12 further studies.



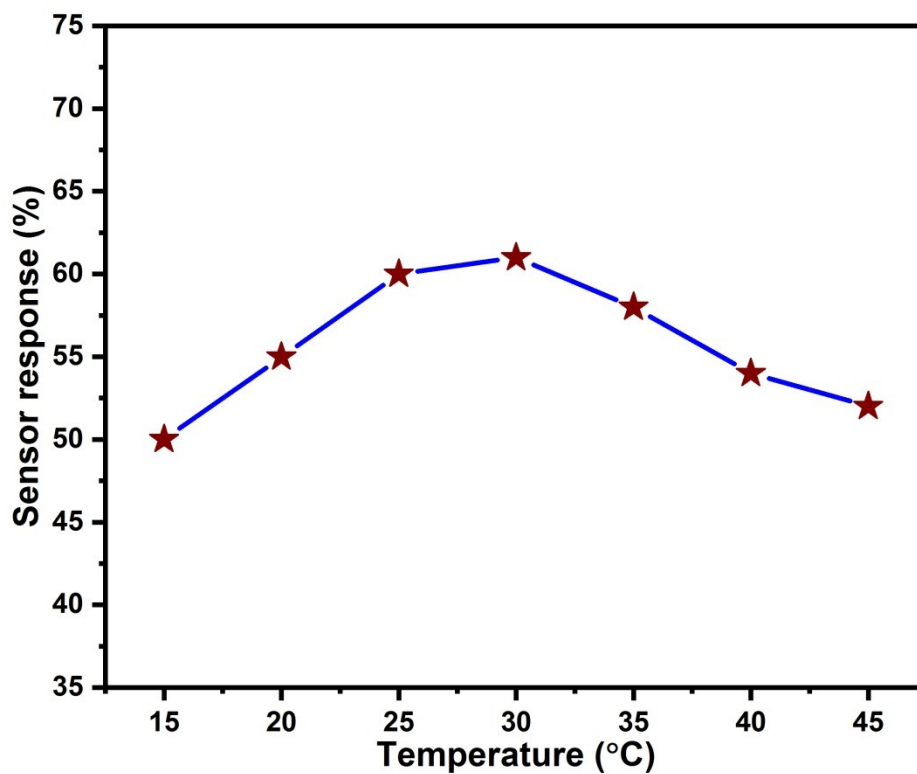

1

2 **Fig. S7.** The thermal effect on the fabricated  $\text{AgBi}_2\text{O}_3$ -GCE sensing response to addition of  
3 glucose in electrolyte solution

1 **Table S1.** Comparison of the Analytical Performance for Different Nanomaterial-Based on Electrochemical Sensing of Glucose

2

| Sensor Materials                              | Detection potential<br>(V) | Sensitivity<br>( $\mu\text{A mM}^{-1} \text{cm}^{-2}$ ) | LOD                 | Linear range                         | Refs.        |
|-----------------------------------------------|----------------------------|---------------------------------------------------------|---------------------|--------------------------------------|--------------|
| Ag/CNT/Ch/ITO                                 | -0.51                      | 135.9                                                   | 0.1 $\mu\text{M}$   | 0.5 – 50 $\mu\text{M}$               | 1            |
| Ag-PANI/rGO                                   | 0.5                        | 2.7664                                                  | 0.79 $\mu\text{M}$  | 0.1 $\mu\text{M}$ – 50 $\mu\text{M}$ | 2            |
| PmAPNFs/AgNPs/GCE                             | 0.34                       | 17.45                                                   | 0.062 $\mu\text{M}$ | 0.1–8.0                              | 3            |
| GOD/nano-BiOx                                 | 0.5                        | 51                                                      | 0.4 $\mu\text{M}$   | 1 $\mu\text{M}$ – 1.5 mM             | 4            |
| SPCE/GNR/Bi <sub>2</sub> O <sub>3</sub>       | 0.6                        | 64.81                                                   | 0.07 mM             | 0.28 - 1.70 mM                       | 5            |
| BiOCl-G NHS                                   | 0.5                        | 1.878                                                   | 0.22 mM             | 0.5 – 2 mM                           | 6            |
| FTO nanoCuBi <sub>2</sub> O <sub>4</sub>  CuO | 0.55                       | 330                                                     | 0.7 $\mu\text{M}$   | Upto 8 mM                            | 7            |
| HO-BiONO <sub>3</sub> - GCE                   | 0.3                        | 8.2                                                     | 0.12 $\mu\text{M}$  | 5 $\mu\text{M}$ – 2.1 mM             | 8            |
| SBO-GCE                                       | 0.55                       | 2.153                                                   | 0.87 $\mu\text{M}$  | 1 $\mu\text{M}$ – 5.848 mM           | Present work |

3

4

1 **Table S2.** Comparison of the Analytical Performance for Different Nanomaterial-Based on Electrochemical Sensing of NO<sub>2</sub><sup>-</sup>

2

| Sensor Materials                                   | Detection potential<br>(V) | Sensitivity<br>( $\mu\text{A mM}^{-1} \text{cm}^{-2}$ ) | LOD   | Linear range                         | Refs.        |
|----------------------------------------------------|----------------------------|---------------------------------------------------------|-------|--------------------------------------|--------------|
| Ag-GCE                                             | 1.0                        | 1642.27                                                 | 0.046 | 1 $\mu\text{M}$ – 6 mM               | 9            |
| Ag-SO <sub>3</sub> -NU-902                         | 1.1                        | -                                                       | 9.1   | Upto 2 mM                            | 10           |
| AgNPs/MWCNTs/GCE                                   | 0.85                       | 0.19                                                    | 0.095 | 1 $\mu\text{M}$ - 100 $\mu\text{M}$  | 11           |
| rGO/AgNPs/poly(PyY)                                | 0.86                       | 13.5                                                    | 0.012 | 1 $\mu\text{M}$ - 1000 $\mu\text{M}$ | 12           |
| Ag-P(MMA-co-AMPS)-<br>GCE                          | 0.9                        | 104.6                                                   | 0.2   | 1 $\mu\text{M}$ - 100 mM             | 13           |
| Bi <sub>2</sub> Se <sub>3</sub> @MWNTs-<br>COOH/CE | 0.8                        | 223                                                     | 0.002 | 0.01 $\mu\text{M}$ - 7 mM            | 14           |
| SBO-GCE                                            | 0.85                       | 22                                                      | 1.8   | 1 $\mu\text{M}$ – 5.848 mM           | Present work |

3

4

5

1 **Table S3.** Comparison of the Analytical Performance for Different Nanomaterial-Based on Electrochemical Sensing of H<sub>2</sub>O<sub>2</sub>

2

| Sensor Materials                                     | Detection potential<br>(V) | Sensitivity<br>( $\mu\text{A mM}^{-1} \text{cm}^{-2}$ ) | LOD                 | Linear range               | Refs.        |
|------------------------------------------------------|----------------------------|---------------------------------------------------------|---------------------|----------------------------|--------------|
| C $\mu$ F/Ag NPs-Naf                                 | -0.35                      | 21.93                                                   | 0.485 $\mu\text{M}$ | 0.10 – 80 mM               | 15           |
| AgNPs/Ox-pTTBA/MWCNT                                 | -0.6                       | -                                                       | 0.24 $\mu\text{M}$  | 10 – 260 $\mu\text{M}$     | 16           |
| PpyNFs-AgNPs-rGO/GCE                                 | -0.75                      | -                                                       | 1.099 $\mu\text{M}$ | 0.1 – 5 mM                 | 17           |
| NF/HRP/Bi <sub>2</sub> O <sub>3</sub> –<br>MWCNT/GCE | -0.3                       | 26.54                                                   | -                   | 8.34 – 28.88               | 18           |
| BiNDs/GaN                                            | -0.7                       | 60                                                      | 5 $\mu\text{M}$     | 0.01 – 1 mM                | 19           |
| CuBi <sub>2</sub> O <sub>4</sub>                     | -0.6                       | 280                                                     | 0.38 mM             | -                          | 20           |
| CPE/BiFeO <sub>3</sub>                               | -0.8                       | 0.142                                                   | 0.080 $\mu\text{M}$ | 0.0002-0.05                | 21           |
| SBO-GCE                                              | -0.5                       | 1.72                                                    | 1.15 $\mu\text{M}$  | 2 $\mu\text{M}$ – 6.847 mM | Present work |

## 1 Reference

- 2 1. J. Lin, C. He, Y. Zhao, S. Zhang, *Sens. Actuat. B.*, 2009, **137**, 768–773,  
3 DOI:10.1016/j.snb.2009.01.033
- 4 2. M. A. Deshmukh, B. C. Kang, T. J. Ha, *J. Mater. Chem. C.*, 2020, **8**, 5112-5123,  
5 DOI:10.1039/C9TC06836H
- 6 3. M. W. Ahmad, S. Varma, D-J. Yang, M. V. Islam, A. Choudhry, *J. Macromole. Sci.*  
7 *Part A.*, 2021, **58**, 461-471, DOI:10.1080/10601325.2021.1886585
- 8 4. S.-N. Ding, D. Shan, H.-G. Xue, and S. Cosnier, *Bioelectrochemistry.*, 2010, **79**, 218–  
9 222, DOI:10.1016/j.bioelechem.2010.05.002
- 10 5. S. Durdic, V. Vukojevic, F. Vlahovic, M. Ognjanovic, L. Svorc, K. Kalcher, J. Mutic,  
11 D. M. Stankovic, *J. Electroanal. Chem.*, 2019, **850**, 113400,  
12 DOI:10.1016/j.jelechem.2019.113400
- 13 6. AI. Gopalan, N. Muthuchamy, KP. Lee, *Biosens. Bioelectron.*, 2017, **89**, 352-360,  
14 DOI:10.1016/j.bios.2016.07.017
- 15 7. C. - H. Wu, E. Onno, C. - Y. Lin, *Electrochim. Acta.*, 2017, **229**, 129–140,  
16 DOI:10.1016/j.electacta.2017.01.130
- 17 8. G. Q. Liu, H. Zhong, X. R. Lia, K. Yang, F. f. Jia, Z. P. Cheng, L. L. Zhang, J. Z.  
18 Yin, L. P. Guo, H. Y. Qian, *Sens. Actuators B Chem.*, 2017, **242**, 484-49,  
19 DOI:10.1016/j.snb.2016.11.019
- 20 9. K. Ramachandran, D. Kalpana, Y. Sathishkumar, Y. S. Lee, K. Ravichandran, G.  
21 Gnanakumar, *J. Ind. Eng. Chem.*, 2016, **35**, 29-35, DOI:10.1016/j.jiec.2015.10.033
- 22 10. Y. C. Wang, Y. C. Chen, W. S. Chuang, J. H. Li, Y. S. Wang, C. H. Chuang, C. Y.  
23 Chen, C. W. Kung, *ACS Appl. Nano. Mater.*, 2020, **3**, 9440-9448,  
24 DOI:10.1021/acsanm.0c02052

- 1 11. Y. Wan, Y. F. Zheng, H. T. Wan, H. Y. Yin, X. C. Song, *Food Cont.*, 2017, **73**, 1507-  
2 1513, DOI:10.1016/j.foodcont.2016.11.014.
- 3 12. K. Dagci, M. Alanyalioglu, *ACS Appl. Mater. Interfaces.*, 2016, **8**, 2713-2722,  
4 DOI:10.1021/acsami.5b10973
- 5 13. P. K. Rastogi, V. Ganesan, S. Krishnamoorthi, *J. Mater. Chem. A.*, 2014, **2**, 933-943.  
6 DOI:10.1039/C3TA13794E
- 7 14. F. Zhu, H. Shi, C. Wang, X. Zhou, X. Zhang, F. Yang, *Sens. Actuators B Chem.*,  
8 2021, **332**, 129454, DOI:10.1016/j.snb.2021.129454
- 9 15. M. Gholami, B. Koivisto, *Appl. Surf. Sci.*, 2018, **467-468**, 112-118,  
10 DOI:10.1016/j.apsusc.2018.10.113
- 11 16. A. A. Abdelwahab, Y.-B. Shim, *Sens. Actuators B Chem.*, 2014, **201**, 51-58,  
12 DOI:10.1016/j.snb.2014.05.004
- 13 17. P. M. Nia, F. Lorestani, W. P. Meng, Y. Alias, *Appl. Surf. Sci.*, 2015, **332**, 648-656,  
14 DOI:10.1016/j.apsusc.2015.01.189
- 15 18. A. P. Periasamy, S. Yang, S.-M. Chen, *Talanta.*, 2011, **87**, 15-23,  
16 DOI:10.1016/j.talanta.2011.09.021
- 17 19. Q.-M. Jiang, M.-R. Zhang, L.-Q. Luo, and G.-B. Pan, *Talanta.*, 2017, **171**, 250-254,  
18 DOI:10.1016/j.talanta.2017.04.075
- 19 20. G. N. Sinha, P. Subramanyam, V. Sivaramakrishna, C. Subrahmanyam, *Inorg. Chem.*  
20 *Commun.*, 2021, **129**, 108627, DOI:10.1016/j.inoche.2021.108627
- 21 21. B. Caglar, F. Icer, K. V. Ozdokur, S. Caglar, A. O. Ozdemir, E. K. Guner, B. M.  
22 Beser, A. Altay, C. Cirak, B. Dogan, A. Tabak, *Mater. Chem. Phys.*, 2021, **262**,  
23 124287, DOI: 10.1016/j.matchemphys.2021.124287
